# Supplementary material for: Synthesis and characterization of the heteroaromatic MF6− (M = As, Sb) salts of the 1,2,4-trithiolanylium dication [PhCSSC(Ph)S]2+
Source: Royal Society of Chemistry journal article supplement (doi:10.1039/b100001m), 2001-01-01
Supplement: b100001mt1.doc [file b100001mt1.doc]

| **S-Table 1 FT-Raman spectra of 2(MF6)2 (M=As, Sb)** | | | | | | |  |
| --- | --- | --- | --- | --- | --- | --- | --- |
| **No.** | **Calc. Freq.a** | Raman of | **Raman of** | **Raman Inten** | **IR Intensity** | **Assignmentb** |  |
|  | **(cm-1)** | **2(SbF6)2** | **2(AsF6)2** | **(Calc.)** | **(Calc.)** |  |  |
| 1 | 35.1 |  |  | 1.31 | 0.9 | phenyl ring def. |  |
| 2 | 39.4 |  |  | 5.6 | 0.2 | phenyl ring def. |  |
| 3 | 56.0 |  |  | 1.5 | 4.8 | phenyl ring def. |  |
| 4 | 64.9 |  |  | 8.63 | 0 | def. of all the three rings |  |
| 5 | 84.6 |  |  | 6.58 | 0.3 | def. of all the three rings |  |
| 6 | 118.9 |  |  | 0.77 | 4.3 | def. of all the three rings |  |
| 7 | 150.2 |  |  | 7.5 | 0.05 | def. of all the three rings |  |
| 8 | 179.3 |  |  | 1.25 | 6 | def. of all the three rings |  |
| 9 | 225.2 | 237.1 m | 236.0 m | 44.52 | 0.1 | def. of all the three rings (ip, sym.) |  |
|  |  | 290.7, 281.0m |  |  |  | SbF6- |  |
|  |  | 303.0 w |  |  |  | SbF6- |  |
| 10 | 293.6 |  |  | 10.79 | 3.6 | def. of all the three rings (ip, asym.) |  |
| 11 | 316.0 | 333.1 w | 333.6 w | 9.89 | 0.2 | def. of all the three rings (op, sym.) |  |
| 12 | 348.0 |  |  | 0.82 | 0.7 | def. of all the three rings. (op, asym.) |  |
| 13 | 371.9 |  |  | 1.65 | 0.2 | phenyl ring def. (op) |  |
| 14 | 372.5 |  |  | 0 | 4.2 | phenyl ring def. (op) |  |
| 15 | 391.6 |  |  | 12.74 | 0.8 | def. of all the three rings (op) |  |
|  |  |  | 401.5, 369.0m |  |  | AsF6- |  |
| 16 | 420.4 |  |  | 0.66 | 15.3 | def. of all the three rings (op) |  |
| 17 | 466.9 |  |  | 0.05 | 31.4 | C2S32+ ring def. (ip, asym) |  |
| 18 | 492.1 | 481.5 w | 482.1m | 12.14 | 2.9 | C2S32+ ring breathing (sym) | * |
| 19 | 503.8 | 504.2 s | 504.7 s | 1.7 | 0.14 | S-S str. | * |
| 20 | 547.0 |  |  | 2.78 | 3.8 | def. of all the three rings (op) |  |
| 21 | 548.9 |  |  | 0.23 | 2.1 | def. of all the three rings (op) |  |
| 22 | 611.2 |  |  | 8.47 | 3.3 | phenyl ring def (ip, asym) |  |
| 23 | 612.0 | 610.3 w | 609.8 m | 5.08 | 3.5 | phenyl ring breathing (sym) |  |
| 24 | 637.7 | 647.0 s | 647.5 s | 1.56 | 194.3 | def. of all the three rings (ip) +  CS str. (asym) |  |
| **No.** | **Calc. Freq.a** | Raman of | **Raman of** | **Raman Inten** | **IR Intensity** | **Assignmentb** |  |
|  | **(cm-1)** | **2(SbF6)2** | **2(AsF6)2** | **(Calc.)** | **(Calc.)** |  |  |
|  |  | ~647m-s |  |  |  | SbF6- |  |
| 25 | 641.6 | 651.3 s | 651.9 s | 4.1 | 8.3 | def. of all the three rings (ip) + CS str. (sym) |  |
| 26 | 651.8 |  |  | 0.7 | 128.8 | CH def. (op, sym) + phenyl ring def. (op) |  |
| 27 | 652.9 |  |  | 0.3 | 10.6 | CH def. (op, asym) + phenyl ring def. (op) |  |
|  |  |  | 681.0 m |  |  | AsF6- |  |
| 28 | 776.6 |  |  | 9.3 | 11.2 | CH def. (op, asym)+ phenyl ring def. (op) |  |
| 29 | 778.4 |  |  | 1.3 | 101.6 | CH def. (op, sym)+ phenyl ring def.(op) |  |
| 32 | 898.2 |  |  | 2.66 | 10.9 | phenyl ring beathing + CS str.(asym) |  |
| 33 | 912.1 | 918.9 w | 918.4 w | 155.5 | 0.9 | phenyl ring beathing + CS str.(sym) |  |
| 34 | 917.9 | 941.0 m | 941.6 m | 123.76 | 1.8 | C-S str. (asym) |  |
| 35 | 946.8 |  |  | 1.23 | 0.4 | CH def (op) |  |
| 36 | 949.0 | 965.8 w | 969.5 w | 2.4 | 1.4 | CH def (op) |  |
| 37 | 989.1 |  |  | 3.11 | 151.8 | phenyl ring breathing (asym) |  |
| 38 | 990.7 |  |  | 73.97 | 15.5 | C-S str. (main) +  Phenyl ring breathing (minor) (sym) |  |
| 39 | 993.0 | 997.7s | 997.8 s | 91.15 | 24.4 | C-S str. (main) +  Phenyl ring breathing (minor) (sym) |  |
| 40 | 998.5 |  |  | 0.88 | 0.03 | CH def (op) |  |
| 41 | 998.6 |  |  | 18.5 | 0.7 | CH def (op) |  |
| 42 | 1003.3 | 1027.0 m | 1027.7 m | 22.44 | 28.1 | CH def (ip) |  |
| 43 | 1004.1 | 1058.2 m | 1059.2 m | 266.5 | 4.7 | CH def (ip, sym) |  |
| 44 | 1036.3 |  |  | 0.13 | 2.2 | CH def (op) |  |
| 45 | 1036.3 |  |  | 2.04 | 1 | CH def (op) |  |
| 46 | 1104.3 | 1111.4 w | 1110.4 w | 19.4 | 2.1 | CH def (ip, asym) |  |
| 47 | 1112.5 | 1126.5 w | 1127.9 w | 32.54 | 5.2 | CH def (ip, sym) |  |
| 48 | 1202.9 | 1174.2 w | 1174.1 w | 13.74 | 1.6 | CH def (ip, asym) |  |
| 49 | 1203.3 | 1193.4 m | 1193.6 m | 7 | 3.4 | CH def (ip, asym) |  |
| 50 | 1211.0 | 1203.0 m | 1204.1 m | 3.06 | 418 | CH def (ip, asym) |  |
| 51 | 1217.5 | 1255.2 s | 1255.8 s | 2.05 | 11.8 | CH def (ip, sym) + C=C str. (minor) |  |
| 52 | 1284.4 |  |  | 4.12 | 1207.4 | two C-C str. (main) + CH def (ip, asym) |  |
| 53 | 1305.8 |  |  | 5.8 | 0.4 | C=C str.+ CH def (ip, sym) |  |
| 54 | 1306.2 | 1289.8 s | 1289.7 s | 28.27 | 21.2 | C=C str.+ CH def (ip, sym) |  |
| **No.** | **Calc. Freq.a** | Raman of | **Raman of** | **Raman Inten** | **IR Intensity** | **Assignmentb** |  |
|  | **(cm-1)** | **2(SbF6)2** | **2(AsF6)2** | **(Calc.)** | **(Calc.)** |  |  |
| 55 | 1317.1 | 1330.7 w | 1328.8 w | 1.14 | 80.4 | C=C str.+C-C str.+ C-H in plane + CS str. |  |
| 56 | 1350.9 | 1349.7 vw |  | 14.96 | 9.5 | CH def (ip, asym) |  |
| 57 | 1351.2 |  |  | 6.14 | 45.9 | CH def (ip, sym) |  |
| 58 | 1438.0 | 1449.6 vw | 1449.5 vw | 18.59 | 12.9 | CH def (ip, asym) |  |
| 59 | 1439.6 |  |  | 6.6 | 64 | CH def (ip, sym) |  |
| 60 | 1468.6 |  |  | 3.43 | 27 | CH def (ip, asym) |  |
| 61 | 1469.2 | 1485.3 w | 1485.8 w | 93.43 | 4.8 | CH def (ip, sym) |  |
| 62 | 1516.7 |  |  | 0.13 | 2.4 | CH def (ip, asym) |  |
| 63 | 1517.0 |  |  | 0.74 | 14 | CH def (ip, sym) |  |
| 64 | 1561.6 | 1569.0 m | 1567.1 m | 128.53 | 631.8 | C=C str.and CH def (ip, asym) |  |
| 65 | 1564.6 | 1583.1 s | 1583.3 s | 291.84 | 61.4 | C=C str.and CH def (ip, sym) |  |
| 66 | 3073.0 | 3072 w | 3073.0 w | 25.5 | 1 | C-H str. |  |
| 67 | 3073.4 |  |  | 8.49 | 2.7 | C-H str. |  |
| 68 | 3078.9 |  |  | 22.03 | 0.3 | C-H str. |  |
| 69 | 3079.5 |  |  | 9.43 | 0.3 | C-H str. |  |
| 70 | 3106.0 | 3096 w |  | 118.67 | 0.8 | C-H str. |  |
| 71 | 3106.0 |  |  | 69.84 | 5.6 | C-H str. |  |
| 74 | 3124.4 |  |  | 715.42 | 24.2 | C-H str. |  |
| 75 | 3124.5 |  |  | 75.32 | 1.6 | C-H str. |  |

a.The calculated frequencies are scaled by a scaling factor of 0.957. b. sym=symmetric, asym=asymmetric, str= stretch, ip= in-plan, op= out-of-plane, def=deformation, main = the vibration mode is dominant, minor = the vibration mode is not dominant. Calculated vibrational frequencies (MPW1PW91/3-21G*) were animated and assigned using Hyperchem.(Release 3 for Windows, Copyright 1993 Hypercube, Inc. and Autodesk, Inc.; Developed by Hypercube, Inc.)

**Reference data**:Ph-H out of plane def., 560-900 cm-1; Ph-H in plane def., 1000-1270 cm-1; C-C str., 750-1200 cm-1, C=C str., 1550-1680 cm-1; Ph C=C 1430-1600 cm-1.
