# Supplementary material for: Synthesis and characterization of the heteroaromatic MF6− (M = As, Sb) salts of the 1,2,4-trithiolanylium dication [PhCSSC(Ph)S]2+
Source: Royal Society of Chemistry journal article supplement (doi:10.1039/b100001m), 2001-01-01
Supplement: b100001mt2.doc [file b100001mt2.doc]

**S-Table 2** Calculated and observed bond distances and angles of **2**

|  | **2(SbF6)2**  **(RT)** | **2(SbF6)2**  **(-60 _C)** | **2(AsF6)2**  **(-100 _C)** | **calc.a** | **calc.b** |
| --- | --- | --- | --- | --- | --- |
| Bonds (_) | | | |  |  |
| C(3)-S(4) | 1.698(8) | 1.680(8) | 1.687(9) | 1.710 | 1.714 |
| S(4)-S(5) | 2.029(5) | 2.024(3) | 2.031(3) | 2.062 | 2.070 |
| S(5)-C(1) | 1.696(12) | 1.683(7) | 1.683(8) | 1.710 | 1.714 |
| C(1)-S(2) | 1.704(16) | 1.699(7) | 1.711(10) | 1.729 | 1.734 |
| S(2)-C(3) | 1.704(15) | 1.694(8) | 1.695(9) | 1.728 | 1.734 |
| C(12)-C(3) | 1.412(15) | 1.424(10) | 1.449(11) | 1.418 | 1.417 |
| C(1)-C(6) | 1.408(12) | 1.412(10) | 1.436(11) | 1.418 | 1.417 |
| C(6)-C(7) | 1.408(18) | 1.403(10) | 1.395(11) | 1.427 | 1.425 |
| C(7)-C(8) | 1.371(11) | 1.377(13) | 1.367(13) | 1.378 | 1.377 |
| C(8)-C(9) | 1.357(16) | 1.356(14) | 1.394(14) | 1.403 | 1.401 |
| C(9)-C(10) | 1.386(19) | 1.376(13) | 1.399(13) | 1.404 | 1.402 |
| C(10)-C(11) | 1.379(13) | 1.378(12) | 1.362(13) | 1.378 | 1.377 |
| C(11)-C(6) | 1.361(13) | 1.366(11) | 1.410(11) | 1.426 | 1.425 |
| C(12)-C(13) | 1.403(13) | 1.392(11) | 1.388(11) | 1.426 | 1.425 |
| C(13)-C(14) | 1.335(16) | 1.351(12) | 1.392(11) | 1.378 | 1.377 |
| C(14)-C(15) | 1.380(16) | 1.359(14) | 1.392(14) | 1.404 | 1.402 |
| C(15)-C(16) | 1.387(17) | 1.363(14) | 1.382(13) | 1.403 | 1.402 |
| C(16)-C(17) | 1.362(17) | 1.365(12) | 1.386(12) | 1.378 | 1.377 |
| C(17)-C(12) | 1.411(15) | 1.397(12) | 1.408(13) | 1.427 | 1.425 |
| H(17A)-C(17) | 0.94(1) | 0.96(2) | 0.948(9) | 1.085 | 1.086 |
| H(16A)-C(16) | 0.93(1) | 0.96(2) | 0.949(11) | 1.082 | 1.084 |
| H(15A)-C(15) | 0.96(1) | 0.96(2) | 0.930(9) | 1.083 | 1.085 |
| H(14A)-C(14) | 0.93(1) | 0.96(2) | 0.936(9) | 1.082 | 1.084 |
| **S-Table 2 continued** | | | |  |  |
|  | **2(SbF6)2 (RT)** | **2(SbF6)2**  **(-60 _C)** | **2(AsF6)2**  **(-100 _C)** | **calc.a** | **calc.b** |
| H(13A)-C(13) | 0.96(1) | 0.96(2) | 0.952(9) | 1.085 | 1.086 |
| H(7A)-C(7) | 0.95(1) | 0.96(2) | 0.957(8) | 1.085 | 1.086 |
| H(8A)-C(8) | 0.95(1) | 0.96(2) | 0.948(8) | 1.082 | 1.084 |
| H(9A)-C(9) | 0.95(1) | 0.96(2) | 0.958(10) | 1.083 | 1.085 |
| H(10A)-C(10) | 0.95(1) | 0.96(2) | 0.955(9) | 1.082 | 1.084 |
| H(11A)-C(11) | 0.95(1) | 0.96(2) | 0.930(7) | 1.085 | 1.086 |
| Angles (_) | | | |  |  |
| C(12)-C(3)-S(4) | 121.3(6) | 121.8(6) | 119.5(6) | 120.1 | 120.4 |
| C(12)-C(3)-S(2) | 119.8(6) | 118.8(6) | 120.1(6) | 120.6 | 120.9 |
| C(3)-S(4)-S(5) | 100.3(3) | 100.4(3) | 99.5(3) | 99.8 | 99.9 |
| S(4)-S(5)-C(1) | 100.4(3) | 99.8(3) | 100.4(3) | 99.8 | 99.9 |
| S(5)-C(1)-S(2) | 118.9(5) | 119.5(4) | 119.5(4) | 119.2 | 118.6 |
| C(1)-S(2)-C(3) | 101.5(4) | 100.8(4) | 100.2(4) | 100.7 | 101.4 |
| S(2)-C(3)-S(4) | 119.0(5) | 119.4(4) | 120.5(5) | 119.2 | 118.6 |
| S(5)-C(1)-C(6) | 121.0(6) | 120.0(5) | 120.4(6) | 120.1 | 120.4 |
| S(2)-C(1)-C(6) | 120.2(6) | 120.4(6) | 120.1(6) | 120.6 | 120.9 |
| C(1)-C(6)-C(7) | 119.0(8) | 119.7(8) | 119.1(7) | 120.0 | 119.9 |
| C(1)-C(6)-C(11) | 122.1(8) | 121.2(8) | 120.4(7) | 120.8 | 120.9 |
| C(6)-C(7)-C(8) | 120.5(9) | 120.3(9) | 120.1(8) | 120.1 | 120.1 |
| C(7)-C(8)-C(9) | 118.8(9) | 120(1) | 120.1(9) | 119.9 | 119.8 |
| C(8)-C(9)-C(10) | 121(1) | 121(1) | 119.3(8) | 120.8 | 119.9 |
| C(9)-C(10)-C(11) | 120.0(9) | 120(1) | 121.7(9) | 120.0 | 120.0 |
| C(10)-C(11)-C(6) | 120.8(8) | 120.0(9) | 118.3(8) | 120.0 | 119.2 |
| C(11)-C(6)-C(7) | 118.9(8) | 119.1(8) | 120.5(7) | 119.2 | 119.2 |
| C(3)-C(12)-C(17) | 121.1(8) | 120.7(8) | 120.1(7) | 120.0 | 119.9 |
|  | **2(SbF6)2 (RT)** | **2(SbF6)2**  **(-60 _C)** | **2(AsF6)2**  **(-100 _C)** | **calc.a** | **calc.b** |
| C(3)-C(12)-C(13) | 121.5(8) | 121.9(8) | 120.1(7) | 120.8 | 120.9 |
| C(17)-C(12)-C(13) | 117.4(8) | 117.3(8) | 119.0(7) | 119.2 | 119.2 |
| C(12)-C(13)-C(14) | 120.9(8) | 121(1) | 121.8(8) | 120.0 | 120.0 |
| C(13)-C(14)-C(15) | 120.9(9) | 120(1) | 118.2(8) | 120.0 | 119.9 |
| C(14)-C(15)-C(16) | 120(1) | 121(1) | 120.8(9) | 120.8 | 121.0 |
| C(15)-C(16)-C(17) | 120(1) | 119(1) | 120.8(9) | 119.9 | 119.8 |
| C(16)-C(17)-C(12) | 118.7(9) | 121(1) | 119.2(8) | 120.1 | 120.1 |

a. MPW1PW91/3-21G* b. MPW1PW91/6-31G*
