# Supplementary material for: Synthesis and characterization of the heteroaromatic MF6− (M = As, Sb) salts of the 1,2,4-trithiolanylium dication [PhCSSC(Ph)S]2+
Source: Royal Society of Chemistry journal article supplement (doi:10.1039/b100001m), 2001-01-01
Supplement: b100001mt3.doc [file b100001mt3.doc]

| **S-table 3. FT-Raman spectra of 1MF6 (M=As, Sb)** | | | | | | | | |
| --- | --- | --- | --- | --- | --- | --- | --- | --- |
| **No.** | **Raman of**  **1SbF6** | **Raman of**  **1AsF6** | **Raman of**  **PhCSSSCl** | **Cal. Freqa** | **IR Intensity**  **(calc.)** | **Raman Intensity**  **(calc.)** | **Assignmentb** |  |
|  |  |  |  |  |  |  |  |
| 1 |  |  |  | 19.2 | 0.0 | 0.9 | ring def.(asym) |  |
|  |  |  | 110.1 s |  |  |  |  |  |
| 2 |  |  | 125.5 s | 92.2 | 0.9 | 0.6 | op ring def.(asym) |  |
| 3 | 121.6m | 119.5 m |  | 125.0 | 0.2 | 0.1 | ip ring bending vibration (sym) | * |
|  |  |  | 145.6 m |  |  |  |  |  |
| 4 |  |  | 171.1 m | 176.7 | 1.3 | 3.4 | rings pluckering |  |
| 5 | 216.1w | 214.0 w | 216.0 w | 279.2 | 2.1 | 16.5 | ip two ring def. (sym) |  |
| 6 |  |  |  | 359.2 | 0.5 | 0.2 | ip two ring def. (asym) |  |
|  | 282.4 w |  | 282.8 w |  |  |  | SbF6- |  |
| 7 |  |  |  | 377.8 | 0.0 | 0.0 | phenyl ring pluckering |  |
| 8 |  |  |  | 396.9 | 5.6 | 1.6 | rings pluckering with S in plane |  |
| 9 | 483.4w | 482.0 w | 477.8 s | 475.0 | 0.8 | 2.9 | S-S-S sym. str. | * |
| 10 |  |  |  | 498.0 | 0.0 | 16.5 | S-S-S asym. str. | * |
| 11 | 534.1m | 531.0 m | 510.9 s | 501.6 | 15.7 | 30.8 | CSSS ring breathing (sym) | * |
| 12 |  |  |  | 567.3 | 0.9 | 1.2 | rings pluckering |  |
| 13 | 613.6w | 614.1 w | 613.0 w | 619.8 | 1.2 | 7.7 | ip phenyl ring def. (asym) |  |
|  | 647.6 m |  |  |  |  |  | SbF6- |  |
| 14 | 669.2m | 669.2m | 664.9 m | 663.7 | 40.4 | 26.4 | ip phenyl ring def. (sym) |  |
|  |  | 680.9 w |  |  |  |  | AsF6- |  |
| 15 |  |  |  | 667.4 | 70.9 | 1.0 | C-H op def. |  |
| 16 |  |  |  | 783.4 | 49.7 | 0.2 | C-H op def. |  |
| 17 |  |  |  | 817.0 | 0.0 | 2.7 | C-H op def. |  |
| 18 |  |  |  | 939.5 | 0.9 | 0.7 | C-H op def. |  |
| 19 | 963.9vw |  |  | 952.7 | 1.7 | 15.5 | sym. str. (CSS) + phenyl ring breathing |  |
| 20 | 975.2vw | 977vw | 978.3 m | 982.7 | 27.2 | 0.0 | asym. str. (CSS)+ CH ip def. |  |
| 21 |  |  |  | 990.9 | 0.0 | 0.4 | C-H op def. |  |
| 22 | 1000.7m | 1000.1m | 999.9 m | 999.7 | 28.2 | 39.6 | sym ip phenyl ring breathing |  |
| 23 |  |  |  | 1014.7 | 2.4 | 43.2 | ip def. (C-H) |  |
| 24 | 1027.8 vw |  | 1031.5 m | 1029.1 | 0.5 | 1.1 | C-H op def. |  |
| **No.** | **Raman of**  **1SbF6** | **Raman of**  **1AsF6** | **Raman of**  **PhCSSSCl** | **Cal. Freqa** | **IR Intensity**  **(calc.)** | **Raman Intensity**  **(calc.)** | **Assignmentb** |  |
| 25 |  |  |  | 1108.0 | 1.9 | 1.1 | ip def. (C-H) |  |
| 26 | 1165.5v w | 1163.0 vw |  | 1198.5 | 0.7 | 12.6 | ip def. (C-H) |  |
| 27 | 1191.9 m | 1191.4m | 1188.0 m | 1208.5 | 48.9 | 44.1 | ip def. (C-H) (sym.) |  |
| 28 | 1300.7s | 1300.9s | 1296.5 s | 1307.3 | 0.3 | 5.7 | asym. str. (C=C) |  |
| 29 | 1316.9 s | 1317.5s | 1311.3 s | 1329.8 | 472.3 | 317.3 | str. (C-C) + CH ip def.+ C-S str. |  |
|  |  |  |  |  |  |  | + C=C str. |  |
| 30 |  |  |  | 1346.4 | 19.7 | 7.9 | ip def. (C-H) |  |
| 31 | 1450.4 vw |  |  | 1443.8 | 30.2 | 9.7 | ip def. (C-H) |  |
| 32 | 1493.3 m | 1492.1m | 1492.7 m | 1486.2 | 15.6 | 17.0 | ip def. (C-H) (sym.) |  |
| 33 | 1589.0 s |  |  | 1539.7 | 3.5 | 0.1 | ip def. (C-H) + C=C str. |  |
| 34 | 1588.2 s | 1588.0s | 1586.5 s | 1570.4 | 173.2 | 390.5 | sym. str.(C=C) + ip def (C-H) |  |
| 37 |  |  | 3048.9 m | 3105.8 | 0.6 | 75.2 | asym. str. (C-H) |  |
| 38 | 3061 vw |  |  | 3118.4 | 1.0 | 101.4 | asym. str. (C-H) |  |
| 39 | 3076 vw |  | 3071.4 m | 3125.7 | 0.4 | 277.5 | sym. str. (C-H) |  |

a.The calculated frequencies are scaled by a scaling factor of 0.957. b. sym=symmetric, asym=asymmetric, str= stretch, ip= in-plan, op= out-of-plane, def=deformation, main = the vibration mode is dominant minor = the vibration mode is not dominant. Calculated vibrational frequencies (MPW1PW91/3-21G*) were animated and assigned using Hyperchem.(Release 3 for Windows, Copyright 1993 Hypercube, Inc. and Autodesk, Inc.; Developed by Hypercube, Inc.)

**Reference data**:Ph-H out of plane def., 560-900 cm-1; Ph-H in plane def., 1000-1270 cm-1; C-C str., 750-1200 cm-1, C=C str., 1550-1680 cm-1; Ph C=C 1430-1600 cm-1.
