# Supplementary figures and images for: Synthesis and characterization of the heteroaromatic MF6− (M = As, Sb) salts of the 1,2,4-trithiolanylium dication [PhCSSC(Ph)S]2+
Source: Royal Society of Chemistry journal article supplement (doi:10.1039/b100001m), 2001-01-01

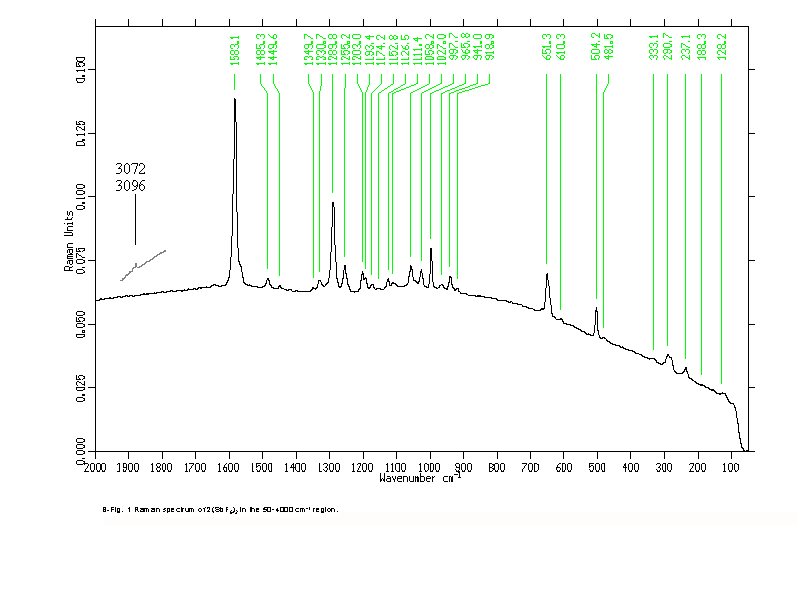

Supplement: b100001mf1.doc [file b100001mf1.doc]

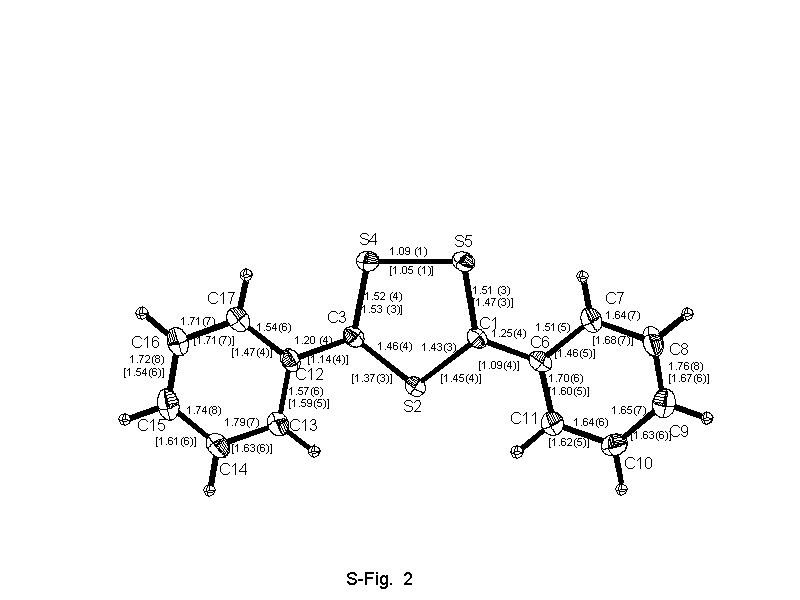

Supplement: b100001mf2.doc [file b100001mf2.doc]
